# Supplementary material for: Distrustful, Dissatisfied, and Conspiratorial: A Latent Profile Analysis of COVID-19 Vaccination Rejection
Source: MDPI journal article supplement (doi:10.3390/ijerph191610096), 2022-08-15
Supplement: s1 [file s1]

**Table S1.** Descriptive statistics of key variables.

|                                                                  | M     | SD    | 1      | 2      | 3      | 4      | 5      | 6     | 7      | 8      | 9      | 10     | 11     | 12     | 13     | 14    | 15     |
|------------------------------------------------------------------|-------|-------|--------|--------|--------|--------|--------|-------|--------|--------|--------|--------|--------|--------|--------|-------|--------|
| 1. Trust in parliament                                           | 3.86  | 2.42  | -      |        |        |        |        |       |        |        |        |        |        |        |        |       |        |
| 2. Trust in politicians                                          | 2.72  | 2.25  | .69**  | -      |        |        |        |       |        |        |        |        |        |        |        |       |        |
| 3. Trust in political parties                                    | 2.78  | 2.22  | .64**  | .83**  | -      |        |        |       |        |        |        |        |        |        |        |       |        |
| 4. Trust in scientists                                           | 7.15  | 2.17  | .37**  | .28**  | .27**  | -      |        |       |        |        |        |        |        |        |        |       |        |
| 5. Satisfaction with government                                  | 3.77  | 2.90  | .53**  | .59**  | .52**  | .13**  | -      |       |        |        |        |        |        |        |        |       |        |
| 6. Small group controlling the world<br>conspiracy<br>theory     | 3.44  | 1.22  | -.10** | -.07*  | -.08** | -.09** | -0.01  | -     |        |        |        |        |        |        |        |       |        |
| 7. Scientists fabricating conspiracy theory                      | 3.19  | 1.22  | -.18** | -.15** | -.14** | -.24** | -.08** | .37** | -      |        |        |        |        |        |        |       |        |
| 8. COVID-19 conspiracy theory                                    | 3.21  | 1.36  | -.22** | -.18** | -.18** | -.25** | -.17** | .25** | .41**  | -      |        |        |        |        |        |       |        |
| 9. Satisfaction with government's<br>dealing with pandemic       | 4.68  | 2.79  | .38**  | .41**  | .36**  | .15**  | .63**  | -0.05 | -.10** | -.19** | -      |        |        |        |        |       |        |
| 10. Trusting government dealing<br>with pandemic                 | 4.60  | 2.82  | .45**  | .47**  | .43**  | .18**  | .71**  | -0.06 | -.10** | -.20** | .77**  | -      |        |        |        |       |        |
| 11. Following government or own rules when fighting the pandemic | 5.30  | 3.14  | -.26** | -.23** | -.21** | -.14** | -.33** | 0.03  | .09**  | .17**  | -.39** | -.39** | -      |        |        |       |        |
| 12. COVID-19 vaccination                                         | 2.19  | 0.70  | -.19** | -.16** | -.15** | -.23** | -.23** | 0.05  | .20**  | .23**  | -.26** | -.27** | .30**  | -      |        |       |        |
| 13. Age                                                          | 49.41 | 18.99 | -0.04  | -0.04  | -0.04  | 0.04   | .07*   | 0.04  | .14**  | 0.01   | .27**  | .22**  | -.06*  | -.13** | -      |       |        |
| 14. Gender                                                       | 1.53  | 0.50  | -0.03  | 0.02   | -0.00  | -0.04  | -0.05  | -0.04 | -0.05  | 0.01   | 0.01   | -0.01  | 0      | 0.08   | 0.02   | -     |        |
| 15. Education                                                    | 2.18  | 0.76  | .11**  | 0.02   | 0.02   | .19**  | -.07*  | -0.02 | -.16** | -.18** | -.07*  | -.06*  | 0.05   | -0.07  | -.08** | .08** | -      |
| 16. Political orientation                                        | 2.96  | 0.98  | .23**  | .26**  | .22**  | -0.02  | .54**  | -0.01 | -0.02  | 0.01   | .41**  | .45**  | -.20** | -.11*  | -0.00  | 0.01  | -.15** |

Note. \*\*  $p < 0.01$ , \*  $p < 0.05$ .

**Table S2.** Post hoc test of profile differences on latent variables.

|                              |                                 | Group comparison        | Mean difference | SE   |
|------------------------------|---------------------------------|-------------------------|-----------------|------|
| Hochberg's post hoc test     | Trust in scientists             | Profile 1 vs. Profile 2 | 4.57***         | 0.16 |
|                              |                                 | Profile 1 vs. Profile 3 | -0.97***        | 0.09 |
|                              |                                 | Profile 2 vs. Profile 3 | -5.54***        | 0.15 |
|                              | Satisfaction with government    | Profile 1 vs. Profile 2 | 0.72*           | 0.3  |
|                              |                                 | Profile 1 vs. Profile 3 | -1.27***        | 0.18 |
|                              |                                 | Profile 2 vs. Profile 3 | -1.99***        | 0.28 |
| Games Howell's post hoc test | The small group leads the world | Profile 1 vs. Profile 2 | 0.54***         | 0.14 |
|                              |                                 | Profile 1 vs. Profile 3 | 1.04***         | 0.07 |
|                              |                                 | Profile 2 vs. Profile 3 | 0.50***         | 0.13 |
|                              | Scientists fabricating          | Profile 1 vs. Profile 2 | 0.45***         | 0.12 |
|                              |                                 | Profile 1 vs. Profile 3 | 1.58***         | 0.06 |
|                              |                                 | Profile 2 vs. Profile 3 | 1.12***         | 0.11 |
|                              | COVID-19 conspiracy             | Profile 1 vs. Profile 2 | 0.60***         | 0.13 |
|                              |                                 | Profile 1 vs. Profile 3 | 1.87***         | 0.07 |
|                              |                                 | Profile 2 vs. Profile 3 | 1.28***         | 0.12 |

Note. \*\*\* p < 0.001, \* p < 0.05.

**Table S3.** Post hoc test of differences between profiles regarding the COVID-19 pandemic and government.

|                              |                                                                    | Group comparison        | Mean difference | SE   |
|------------------------------|--------------------------------------------------------------------|-------------------------|-----------------|------|
| Hochberg's post hoc test     | Following the government's or own rules when fighting the pandemic | Profile 1 vs. Profile 2 | -0.60           | 0.33 |
|                              |                                                                    | Profile 1 vs. Profile 3 | 0.91***         | 0.19 |
|                              |                                                                    | Profile 2 vs. Profile 3 | 1.51***         | 0.31 |
| Games Howell's post hoc test | Satisfaction with government                                       | Profile 1 vs. Profile 2 | 0.72            | 0.32 |
|                              |                                                                    | Profile 1 vs. Profile 3 | -1.02***        | 0.18 |
|                              |                                                                    | Profile 2 vs. Profile 3 | -1.74***        | 0.3  |
|                              | Trusting government dealing with pandemic                          | Profile 1 vs. Profile 2 | 1.13***         | 0.31 |
|                              |                                                                    | Profile 1 vs. Profile 3 | -1.07***        | 0.18 |
|                              |                                                                    | Profile 2 vs. Profile 3 | -2.20***        | 0.29 |

Note. \*\*\*  $p < 0.001$ .
